# Supplementary material for: Cohesin-independent segregation of sister chromatids in budding yeast
Source: PubMed Central journal article supplement — Mol Biol Cell. 2012 Feb 15;23(4):729–39. doi: 10.1091/mbc.E11-08-0696 (PMC3279399; doi:10.1091/mbc.e11-08-0696), 2012-02-15
Supplement: supp_E11-08-0696_CombinedSupMats.pdf [file supp_E11-08-0696_CombinedSupMats.pdf]

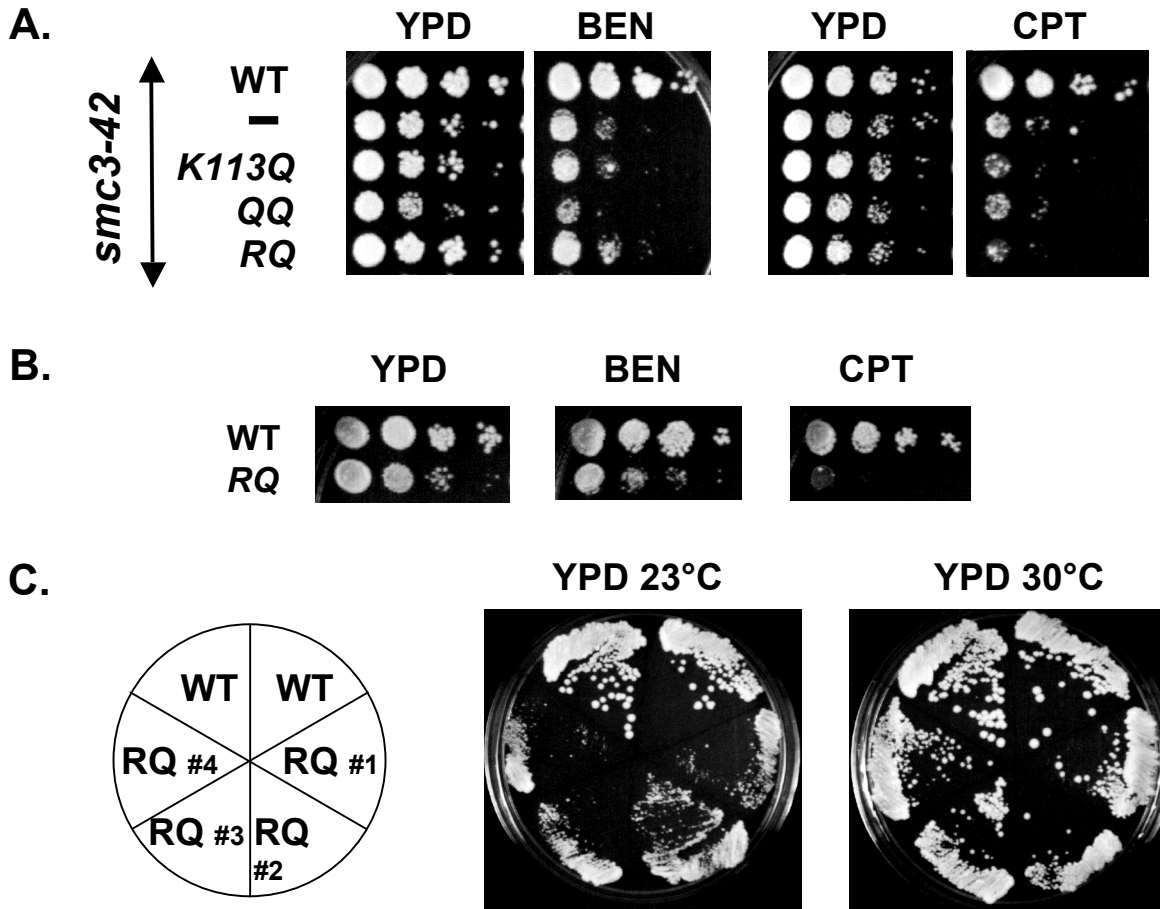

**Supplemental Figure 1.** *smc3* acetyl-mimics are sensitive to benomyl, camptothecin and are cold-sensitive. (A) Acetyl-mimics in an *smc3-42* background. Strains from figure 1A grown and plated as described in figure 1A. Parent *smc3-42* alone (-) or containing a second *SMC3* allele (WT), (K113Q), (QQ) or (RQ) were plated on YPD alone or containing 10ug/ml benomyl (BEN) or and incubated at 30°C for 3d or 5d, respectively (left side), or YPD alone or containing 10ug/ml camptothecin (CPT) and incubated at 23°C for 3d or 5d, respectively (right side). (B) & (C) Haploids from figure 1B containing either *SMC3* (WT) or *smc3-RQ* (RQ) as the sole *SMC3*. (B) Cells were grown in YPD liquid at 30°C, plated in 10 fold dilutions on YPD alone, or containing 10ug/ml benomyl (BEN) or 10ug/ml Camptothecin (CPT) then incubated at 30°C for 3d. (C) Cells were dilution streaked onto YPD and incubated at 23°C for 4d or 30°C for 3d.

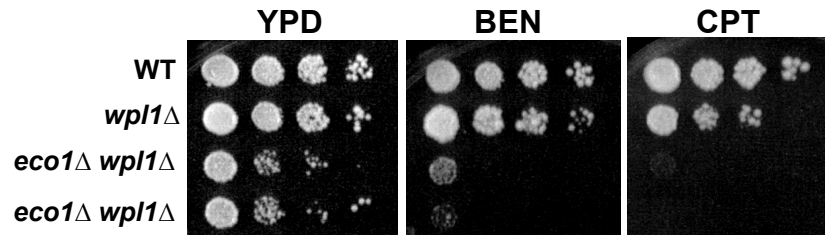

**Supplemental Figure 2.** *eco1*Δ *wpl1*Δ cells are sensitive to microtubule and DNA damaging agents. WT, *wpl1*Δ and *eco1*Δ *wpl1*Δ haploids from Figure 3A were grown in YPD liquid (23°C), plated in 10 fold serial dilutions onto YPD alone or containing 10ug/ml benomyl (BEN) or 10 ug/ml camptothecin (CPT). YPD was incubated for 3d (23°C) and BEN and CPT plates for 4d (23°C).

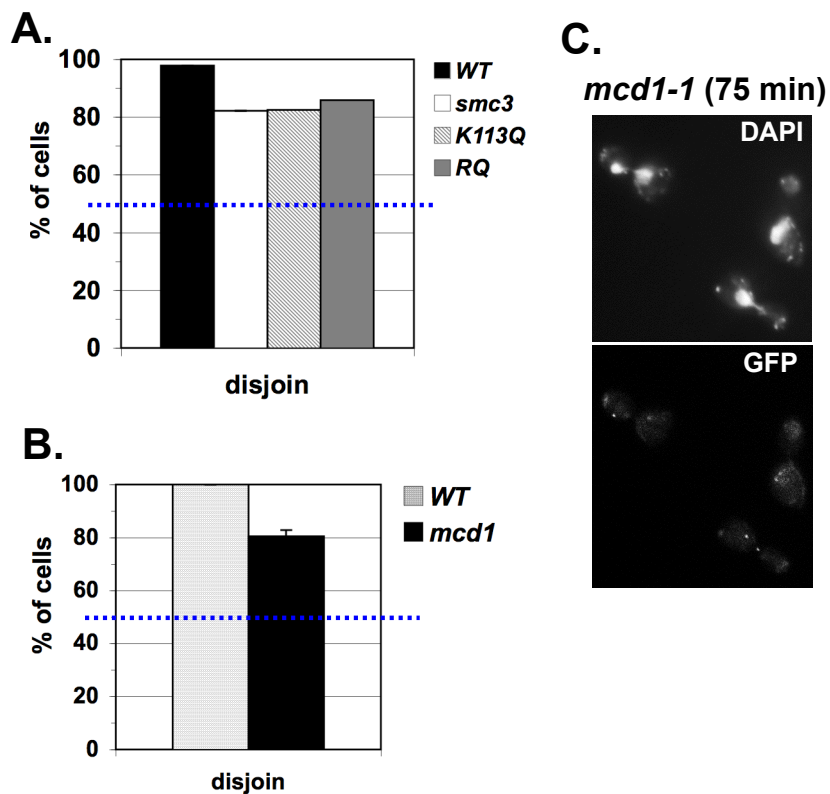

**Supplemental Figure 3.** G1 phase cells of cohesin mutants that completed one cell cycle without functional cohesin segregate sister chromatids. (A & B) G1 phase cells that completed one cell cycle at 35.5°C as described in Figure 4 and scored for disjunction. Chr. IV segregation was monitored at a *CEN4*-proximal locus (*TRP1*) marked with GFP. Dotted line marks the 50% disjunction expected for random segregation. (A) chr IV disjunction in G1 phase cells from figure 4, *smc3-42* cells alone (*smc3*) or with a second *SMC3* allele, (WT), (*K113Q*) or (*RQ*). (B & C) WT or *mcd1-1* mutant cells from figure 5. (B) chr IV disjunction in G1 phase cells (C) Micrographs of *mcd1-1* cells 75min after release from the initial G1 phase arrest.

## Yeast strain table\*

|            |                                                                                                                      |
|------------|----------------------------------------------------------------------------------------------------------------------|
| VG3358-3B  | Mata <i>smc3-42 LacO-NAT::lys4 LacIGFP-HIS3:his3-11,15 trp1-1 leu2-3,112 ura3-52 bar1</i>                            |
| VG3377-1A  | same as VG3358-3B except <i>SMC3-URA3:ura3-52</i>                                                                    |
| VG3378-2A  | same as VG3358-3B except <i>smc3K112Q,K113Q-URA3:ura3-52</i>                                                         |
| VG3423-1A  | same as VG3358-3B except <i>smc3K113Q-URA3:ura3-52</i>                                                               |
| VG3424-2A  | same as VG3358-3B except <i>smc3K112R,K113Q-URA3:ura3-52</i>                                                         |
| VG3464-16C | Mata <i>smc3Δ::HPH LacO-NAT::lys4 LacIGFP-TRP1:his3-11,15 trp1-1 leu2-3,112 ura3-52 bar1 + pEU42 (SMC3 URA3 CEN)</i> |
| VG3471-WT  | Mata <i>smc3Δ::HPH LacO-NAT::lys4 LacIGFP-TRP1:his3-11,15 trp1-1 leu2-3,112 ura3-52 bar1 + pEU41 (SMC3 LEU2 CEN)</i> |
| VG3471-RQ  | same as VG3471-WT except + <i>pEU41-RQ (smc3K112R,K113Q LEU2 CEN)</i>                                                |
| VG3357-3A  | Mata <i>smc3-42 LacO-NAT:TRP1 LacIGFP-HIS3:his3-11,15 trp1-1 leu2-3,112 ura3-52bar1</i>                              |
| VG3447-1B  | same as VG3357-3A except <i>SMC3-URA3:ura3-52</i>                                                                    |
| VG3449-3B  | same as VG3358-3B except <i>smc3K113Q-URA3:ura3-52</i>                                                               |
| VG3450-4B  | same as VG3358-3B except <i>smc3K112R,K113Q-URA3:ura3-52</i>                                                         |
| VG3460-2A  | Mata <i>LacO-NAT:TRP1 LacIGFP-HIS3:his3-11,15 trp1-1 leu2-3,112 ura3-52 bar1</i>                                     |
| VG3456-2C  | Mata <i>mcd1-1 LacO-NAT:TRP1 LacIGFP-HIS3:his3-11,15 trp1-1 leu2-3,112 ura3-52 bar1</i>                              |
| VG3349-1B  | Mata <i>LacO-NAT::lys4 LacIGFP-HIS3:his3-11,15 trp1-1 leu2-3,112 ura3-52 bar1</i>                                    |
| VG3360-3D  | Mata <i>wpl1Δ::HPH LacO-NAT::lys4 LacIGFP-HIS3:his3-11,15 trp1-1 leu2-3,112 ura3-52 bar1</i>                         |
| VG3503-1B  | Mata <i>wpl1Δ::HPH ecol1Δ::G418 LacO-NAT::lys4 LacIGFP-HIS3:his3-11,15 trp1-1 ura3-52 leu2-3,112 bar1</i>            |
| VG3503-4A  | same as VG3503-1B                                                                                                    |
| VG3506-5D  | Mata <i>ctf7-203 (eco1-203) LacO-NAT:TRP1 LacIGFP-HIS3:his3-11,15 trp1-1 leu2-3,112 ura3-52 bar1</i>                 |
| VG3513-1B  | Mata <i>wpl1Δ::HPH LacO-NAT:TRP1 LacIGFP-HIS3:his3-11,15 trp1-1 leu2-3,112 ura3-52 bar1</i>                          |
| VG3502-2A  | Mata <i>wpl1Δ::HPH ecol1Δ::G418 LacO-NAT:TRP1 LacIGFP-HIS3:his3-11,15 trp1-1 ura3-52 leu2-3,112 bar1</i>             |
| VG3502-4C  | same as VG3502-2A                                                                                                    |

\* All yeast strains are the A364A background.
